# Supplementary material for: A genetic screen identifies new steps in oocyte maturation that enhance proteostasis in the immortal germ lineage
Source: eLife. 2021 Apr 13;10:e62653. doi: 10.7554/eLife.62653 (PMC8043744; doi:10.7554/eLife.62653)
Supplement: Figure 3—source data 1. [file elife-62653-fig3-data1.xlsx]

## Sheet: Sheet1
Skewness values	pre-mating	10 min	30 min	50 min	70 min
	0.1632	0.1938	0.274714	0.4017	0.35025
	0.19036	0.2269	0.295	0.4179	0.3792
	0.132791	0.197929	0.20905	0.3188	0.4581
	0.1156	0.169042	0.24921	0.2968	0.49022
	0.1552	0.185219	0.20038	0.3748	0.3985
P-values		0.0317	0.0079	0.008	0.0079
