# Supplementary material for: A genetic screen identifies new steps in oocyte maturation that enhance proteostasis in the immortal germ lineage
Source: eLife. 2021 Apr 13;10:e62653. doi: 10.7554/eLife.62653 (PMC8043744; doi:10.7554/eLife.62653)
Supplement: Figure 4—source data 2. [file elife-62653-fig4-data2.xlsx]

## Sheet: Sheet1
Skewness of GFP::VHA-13 signal
Hermaphrodite	Female	Vector control	act-1	pat-3	ani-2	atp-3	atp-2	cct-1	cct-5	hsp-4	spcs-1	srpa-68	vha-12	vha-2	pbs-7	rpn-6.1	rps-20	rpl-3	copb-2	sec-24.1	sar-1	ess-2	cgh-1	let-711	itr-1	sca-1
0.45006	0.1556	0.2968	0.09278	0.119866	0.187545	0.381	0.272375	0.219	0.231	0.0848947	0.0976897	0.095375	0.1258	0.0915625	0.10152	0.214	0.071461	0.173588	0.126273	0.089928	0.163611	0.3077	0.0776896	0.2325	0.1631	0.23077
0.34709	0.1152	0.3748	0.153277	0.192695	0.144095	0.28	0.316455	0.279	0.226	0.19322	0.170223	0.12683	0.0952	0.08723	0.158452	0.189363	0.17482	0.219733	0.133778	0.07926	0.14667	0.207	0.0702228	0.2419	0.23273	0.253882
0.35025	0.07235	0.4103	0.151989	0.17902	0.138822	0.241	0.277	0.253	0.227	0.252292	0.0802938	0.10994	0.098437	0.071428	0.17631	0.133937	0.101578	0.135828	0.20176	0.101578	0.124869	0.077	0.0802938	0.172811	0.156842	0.190883
0.3792	0.15225	0.408	0.110875	0.12091	0.177736	0.419	0.339	0.163	0.234	0.1772	0.110526	0.080526	0.19	0.06564	0.216	0.123	0.12959	0.23185	0.135828	0.22575	0.201346	0.132	0.080526	0.292	0.189	0.227346
0.49022	0.2172	0.3188	0.144318	0.13928	0.150466	0.2912	0.2522	0.283	0.288	0.2167	0.095729	0.1729	0.209	0.136	0.148	0.113	0.18312	0.17815	0.177199	0.14511	0.152509	0.331	0.095729	0.328	0.319	0.117
0.3985	0.15364							0.126	0.207	0.185449	0.149033	0.141925	0.128	0.224	0.196	0.233						0.267	0.129033	0.279	0.348	0.273
0.4671	0.12833							0.153	0.168				0.201	0.163	0.157	0.209						0.272	0.206	0.281	0.09	0.118
								0.149	0.162					0.163	0.15	0.228							0.1119	0.293	0.327	0.194
														0.127	0.224								0.223	0.274	0.189	0.131
																							0.258			0.34
P-values	Hermaphrodite	Female	Vector control	Cytoskeleton	ATP synthase	Chaperones	ER homeostasis	Lysosomal H+ pump	Protein degradation	Protein synthesis	Vesicle-mediated transport	RNA processing	Calcium transport
compared to hermaphrodite		<0.0001	0.6993	<0.0001	0.022	<0.0001	<0.0001	<0.0001	<0.0001	<0.0001	<0.0001	<0.0001	<0.0001
compared to female	<0.0001		<0.0001	0.8153	<0.0001	0.0035	0.6314	0.5881	0.1642	0.447	>0.9999	0.086	0.0209
Skewness of GFP::VHA-13 signal
Hermaphrodite	Female	Vector control	kin-2	ttr-14	par-5	xpo-1	srab-17	rmd-2	dlg-1	lgc-46	aco-2	imb-1
0.3145	0.1752	0.4017	0.143667	0.123951	0.172652	0.173933	0.233565	0.224714	0.143719	0.21573	0.108875	0.131
0.2988	0.2036	0.4179	0.0979444	0.11845	0.296865	0.20925	0.218174	0.178789	0.20559	0.16259	0.059375	0.255
0.2779	0.122791	0.3188	0.194211	0.16538	0.187154	0.151083	0.187421	0.18905	0.177929	0.184727	0.12683	0.144
0.45006	0.1556	0.2968	0.208163	0.115628	0.186312	0.167647	0.199219	0.248921	0.187042	0.087	0.0799412	0.308
0.34709	0.1152	0.3748	0.194	0.271	0.277	0.189944	0.2391	0.20038	0.185219	0.20038	0.179	0.279
0.35025	0.07235	0.4103	0.216619	0.134	0.2392	0.239615		0.155		0.155	0.31	0.162
0.3792	0.15225	0.3188	0.131			0.259131		0.295		0.295	0.188	0.115
0.49022	0.2172	0.2968	0.34							0.325	0.095
0.3985	0.15364										0.206
0.4671	0.12833										0.306
P-values	Hermaphrodite	Female	Vector control	kin-2	ttr-14	par-5	xpo-1	srab-17	rmd-2	dlg-1	lgc-46	aco-2
compared to hermaphrodite		<0.0001	0.6181	0.0003	0.0002	0.0005	0.0001	0.0007	0.0002	0.0007	0.0005	0.0001
compared to female	<0.0001		<0.0001	0.593	0.448	0.011	0.0553	0.008	0.0136	0.1645	0.3812	0.419
