# Supplementary material for: A genetic screen identifies new steps in oocyte maturation that enhance proteostasis in the immortal germ lineage
Source: eLife. 2021 Apr 13;10:e62653. doi: 10.7554/eLife.62653 (PMC8043744; doi:10.7554/eLife.62653)
Supplement: Figure 5—source data 2. [file elife-62653-fig5-data2.xlsx]

## Sheet: Sheet1
Ratio of LysoTracker signal intensity (maturing oocytes/distal germline)
	Hermaphrodite	Female	Empty vector	ESCRT subunits
	1.42825	0.936787	1.32423	1.20562
	1.20031	1.01676	1.23006	1.24162
	1.28677	1.00776	1.18331	1.33525
	1.24597	0.993472	1.2779	1.29238
	1.39414	1.01269	1.28623	1.23424
	1.246	0.87213	1.34289	1.21993
			1.39236	1.28154
				1.32292
				1.22875
P-values
compared to hermaphrodite		0.0022	0.8357	0.4559
compared to female	0.0022		0.0012	0.0004
