# Supplementary material for: A genetic screen identifies new steps in oocyte maturation that enhance proteostasis in the immortal germ lineage
Source: eLife. 2021 Apr 13;10:e62653. doi: 10.7554/eLife.62653 (PMC8043744; doi:10.7554/eLife.62653)
Supplement: Figure 5—source data 3. [file elife-62653-fig5-data3.xlsx]

## Sheet: Sheet1
BioTracker ATP-Red staining of oocytes
	Empty vector RNAi	atp-2 RNAi	cyc-1 RNAi	nuo-2 RNAi
	3526.29	3373.64	3119	3446.15
	3527.69	3392.55	3079.64	3052.74
	3810.45	3372.27	2915.53	2870.43
	3807.4	3059.18	2619.4	2569.91
	3811.18	3421.93	2927.22	2725.91
	3792.09	3271.51	3015.71	2991.03
	3128.17	2739.01	2566.81	2496.29
	3005.59	2751.56	2513.01	2283.2
	3258.83	2611.36	2282.83	2852.02
	3171.3	2525.19	2920.11	3070.05
P-values		0.0288	<0.0001	0.0003
