# Supplementary material for: A genetic screen identifies new steps in oocyte maturation that enhance proteostasis in the immortal germ lineage
Source: eLife. 2021 Apr 13;10:e62653. doi: 10.7554/eLife.62653 (PMC8043744; doi:10.7554/eLife.62653)
Supplement: Figure 5—source data 4. [file elife-62653-fig5-data4.xlsx]

## Sheet: Sheet1
Skewness of GFP::VHA-13 signal
	Hermaphrodite	Female	Vector control	vps-20	vps-28	vps-37	vps-54
	0.3025	0.175019	0.36509	0.28092	0.385	0.274	0.454
	0.2988	0.2036	0.35025	0.31612	0.291	0.273	0.36
	0.358219	0.129791	0.3188	0.26753	0.459	0.31	0.399
	0.45006	0.1556	0.2705	0.26672	0.3	0.218	0.436
	0.34709	0.1752	0.3748	0.311	0.27	0.338	0.393
	0.35025	0.07235	0.4103	0.384	0.248	0.342	0.243
	0.3792	0.15225	0.3288	0.369	0.298082	0.389	0.268
	0.45022	0.15364	0.31598
P-values
compared to hermaphrodite		0.0002	0.5234	0.282	0.152	0.0721	0.7789
compared to female	0.0002		0.0002	0.0003	0.0003	0.0003	0.0003
