# Supplementary material for: A genetic screen identifies new steps in oocyte maturation that enhance proteostasis in the immortal germ lineage
Source: eLife. 2021 Apr 13;10:e62653. doi: 10.7554/eLife.62653 (PMC8043744; doi:10.7554/eLife.62653)
Supplement: Figure 6—source data 1. [file elife-62653-fig6-data1.xlsx]

## Sheet: Sheet1
# of KIN-19 aggregates per animal
	Day of adulthood	1	4	7	11
		17	74	141	159
		9	107	127	163
		15	135	140	149
		5	81	119	162
		9	84	125	99
		13	95	124
				144
P-values			0.0022	0.0012	0.0003
# of KIN-19 aggregates per animal
	Blinded investigator #1						Blinded investigator #2						Blinded investigator #3
	Day of adulthood	1	4	7	11		Day of adulthood	1	4	7	11		Day of adulthood	1	4	7	11
		48	94	136	128			34	87	116	153			55	198	205	256
		23	137	116	122			22	105	122	132			61	270	241	296
		25	164	113	120			34	139	128	99			123	270	360	267
		12	85	104	158			29	94	124	151			44	158	263	263
		10	93	92	82			16	92	120	102			68	167	240	211
		12	89	104				21	101	121				36	173	204
				103						126						307
P-values			0.0022	0.0012	0.0043				0.0022	0.0012	0.0022				0.0022	0.0012	0.0043
# of KIN-19 aggregates per animal
	empty vector	act-5 (RNAi)	copb-2 (RNAi)	pbs-7 (RNAi)	rpn-6.1 (RNAi)	vha-12 (RNAi)	vha-13 (RNAi)	vha-16 (RNAi)	vha-19 (RNAi)
	13	29	69	30	34	88	18	46	18
	11	61	60	45	65	53	19	44	50
	10	22	71	49	67	19	99	48	18
	14	42	62	39	67	48	33	71	62
	15	53	11	48	92	64	48	34	40
	16		68	39					51
	12								27
<20	7	0	1	0	0	1	2	0	2
20 to 50	0	3	0	5	1	1	2	4	3
>50	0	2	5	0	4	3	1	1	2
