# Supplementary material for: A genetic screen identifies new steps in oocyte maturation that enhance proteostasis in the immortal germ lineage
Source: eLife. 2021 Apr 13;10:e62653. doi: 10.7554/eLife.62653 (PMC8043744; doi:10.7554/eLife.62653)
Supplement: Figure 6—source data 2. [file elife-62653-fig6-data2.xlsx]

## Sheet: Sheet1
Skewness of intestinal LysoTracker signal
	Empty vector	vha-12	vha-13	vha-19	act-5	copb-2	pbs-7	rpn-6.1
	1.258	0.5583	0.512	0.796	0.8155	0.8146	0.9551	0.623
	1.215	0.6238	0.631	0.5181	0.7286	0.5643	0.7221	0.6751
	0.8965	0.9138	0.788	0.4982	0.6829	0.6246	1.0495	0.7192
	0.932	0.6473	0.9829	0.728	0.9889	0.483	0.8241	0.8759
	1.44	0.839	0.627
	1.149
	0.8629
	1.1929
P-values		0.0062	0.0109	0.004	0.0283	0.004	0.091	0.0081
