# Supplementary material for: A genetic screen identifies new steps in oocyte maturation that enhance proteostasis in the immortal germ lineage
Source: eLife. 2021 Apr 13;10:e62653. doi: 10.7554/eLife.62653 (PMC8043744; doi:10.7554/eLife.62653)
Supplement: Figure 6—source data 3. [file elife-62653-fig6-data3.xlsx]

## Sheet: Sheet1
	L4440, empty vector			vps-20(RNAi)
	rep1	rep2	rep3	rep1	rep2	rep3
relative vps-20 mRNA levels	1.07776	0.972392	0.949849	0.148142	0.202314	0.109399
P-value				0.003
	L4440, empty vector			vps-54(RNAi)
	rep1	rep2	rep3	rep1	rep2	rep3
relative vps-54 mRNA levels	0.984226	0.77479	1.24098	0.198363	0.359396	0.312793
P-value				0.0434
